# Supplementary material
Source: PubMed Central journal article supplement (PMC2630229)

Figure S1

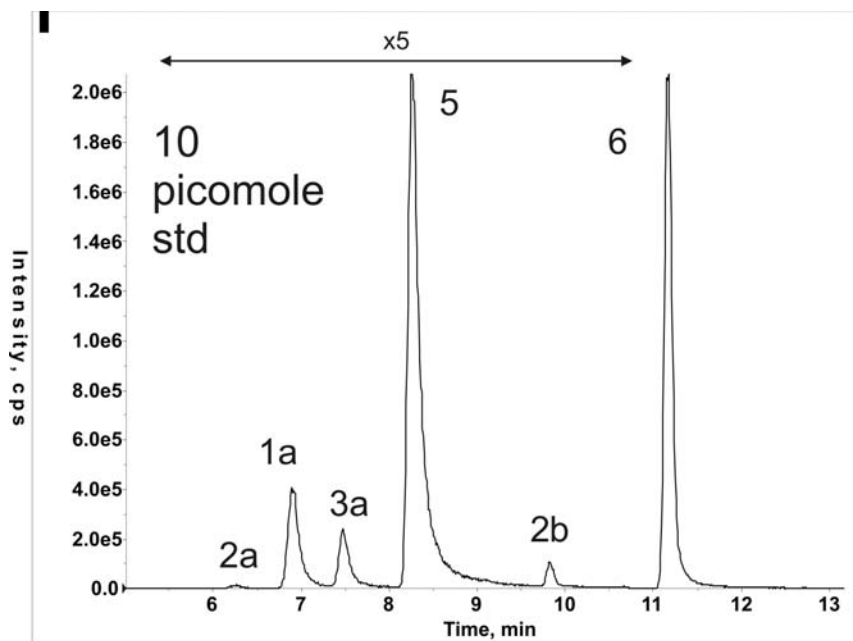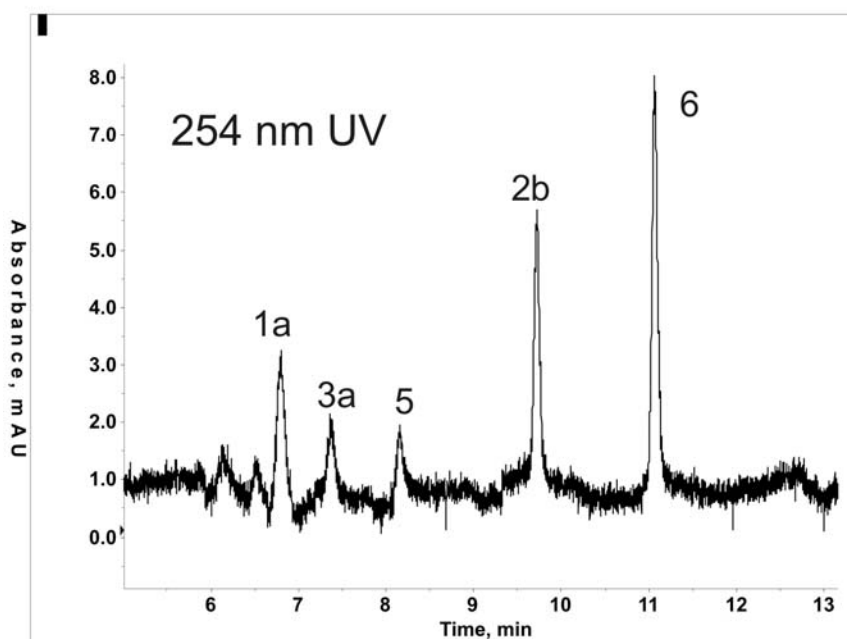

Figure S2

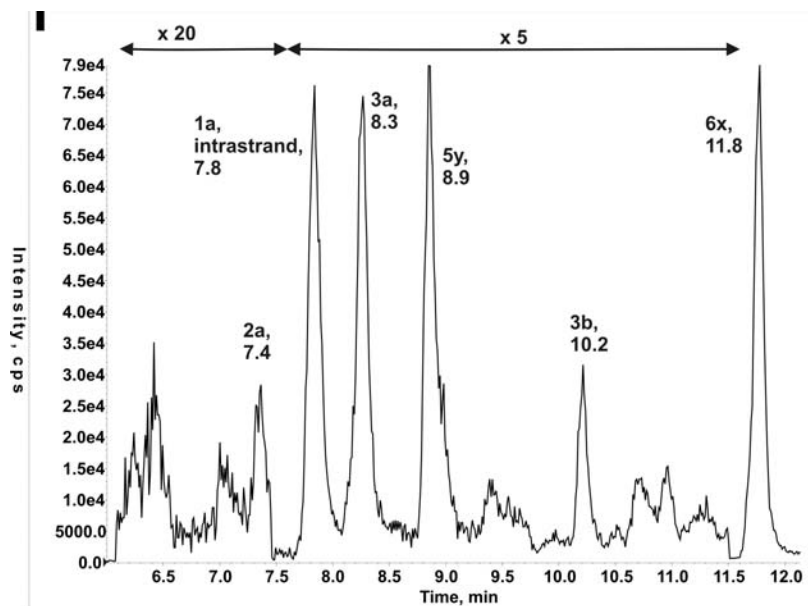

Figure S3A

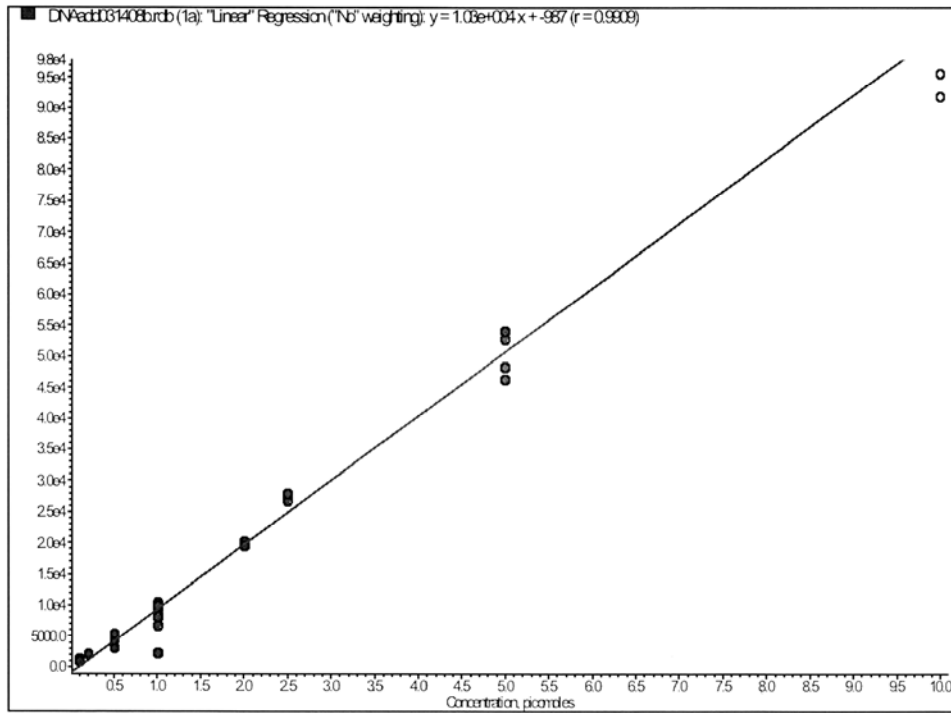

Figure S3B

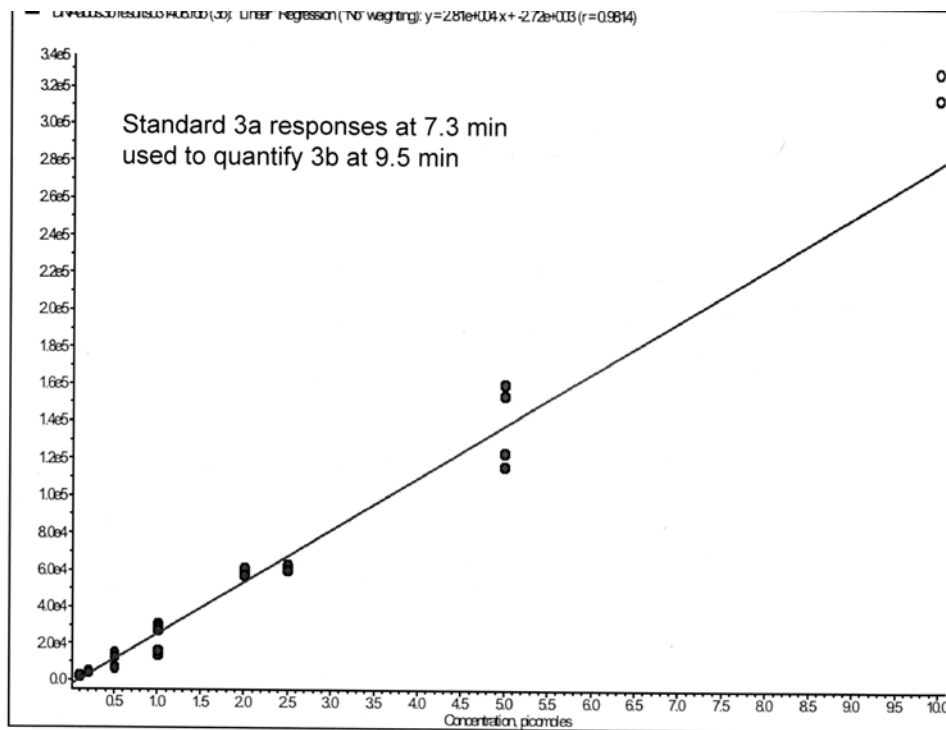

Supplement: NIHMS86488-supplement-1_si_001.pdf [file NIHMS86488-supplement-1_si_001.pdf]
